# Supplementary material
Source: PubMed Central journal article supplement (PMC4994881)
Supplement: NIHMS810757-supplement-Supplemental_Figure_2.pdf [file NIHMS810757-supplement-Supplemental_Figure_2.pdf]

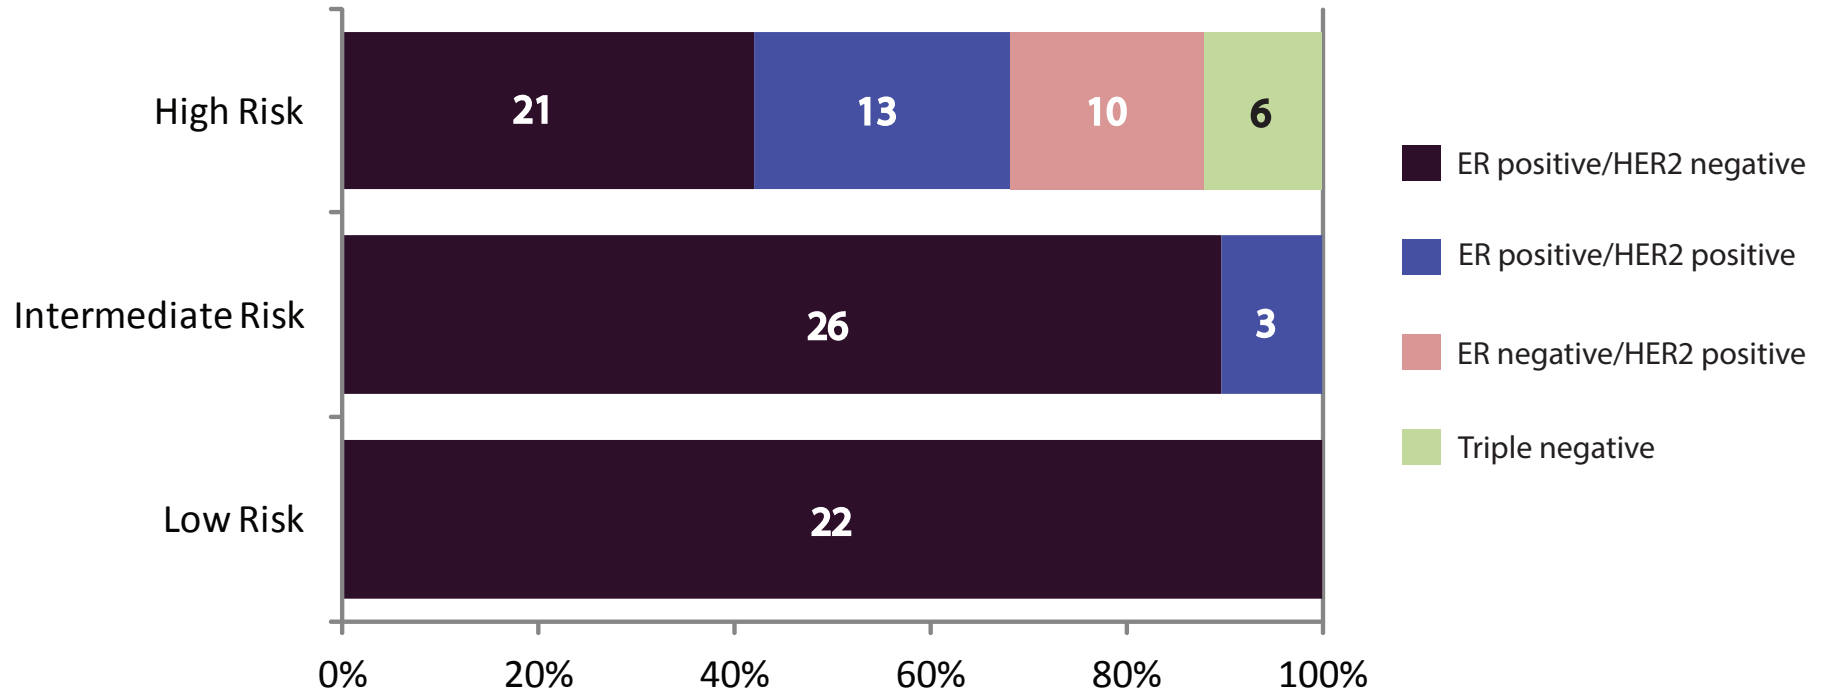

|                                  |          | <b>Median Recurrence Score (range)</b> |
|----------------------------------|----------|----------------------------------------|
| <b>ER positive/HER2 negative</b> | 69 (68%) | 23 (0-59)                              |
| <b>ER positive/HER2 positive</b> | 16 (24%) | 59 (20-77)                             |
| <b>ER negative/HER2 positive</b> | 10 (10%) | 78 (46-100)                            |
| <b>Triple negative</b>           | 6 (6%)   | 62 (33-73)                             |
