# Supplementary material
Source: PubMed Central journal article supplement (PMC4994881)

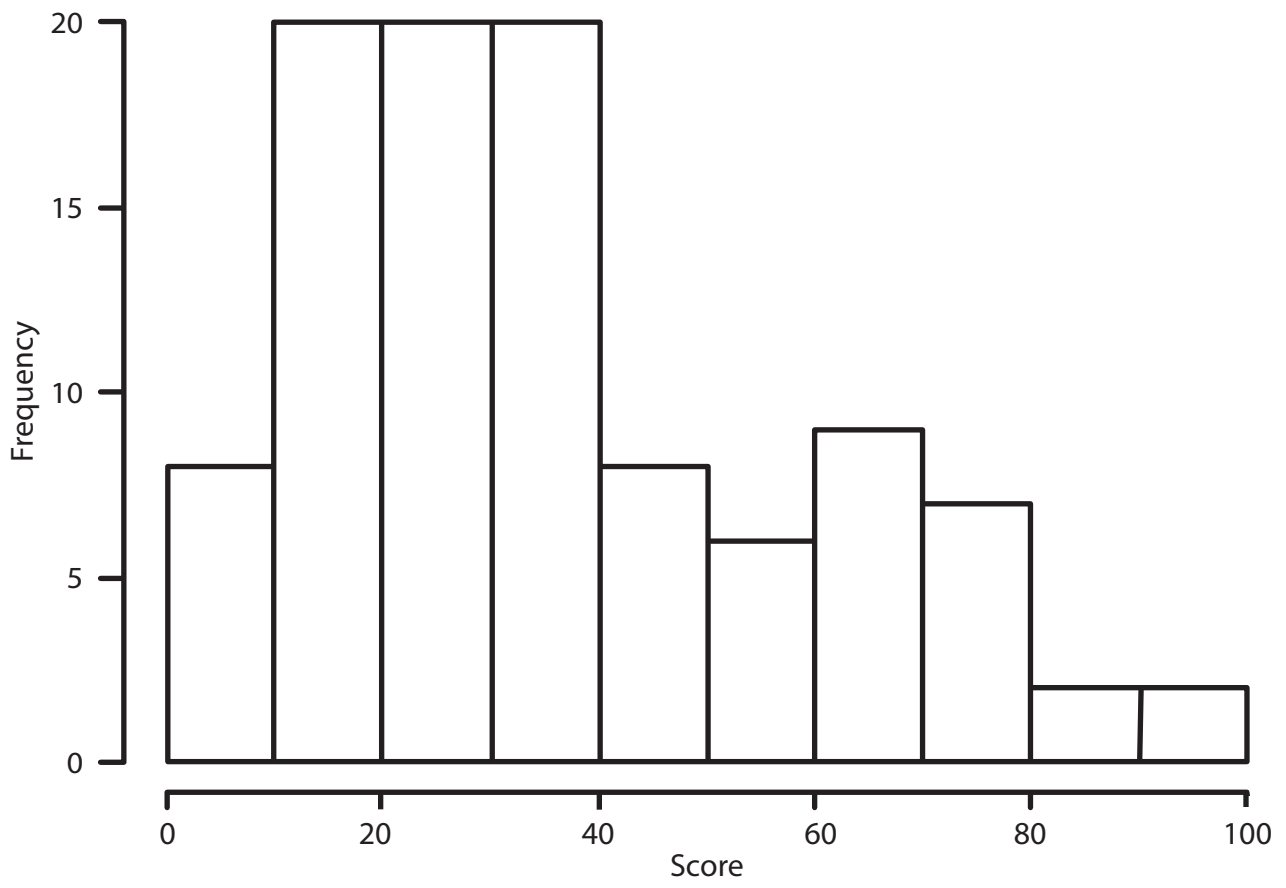

Supplement: NIHMS810757-supplement-Supplemental_Figure_1.pdf [file NIHMS810757-supplement-Supplemental_Figure_1.pdf]

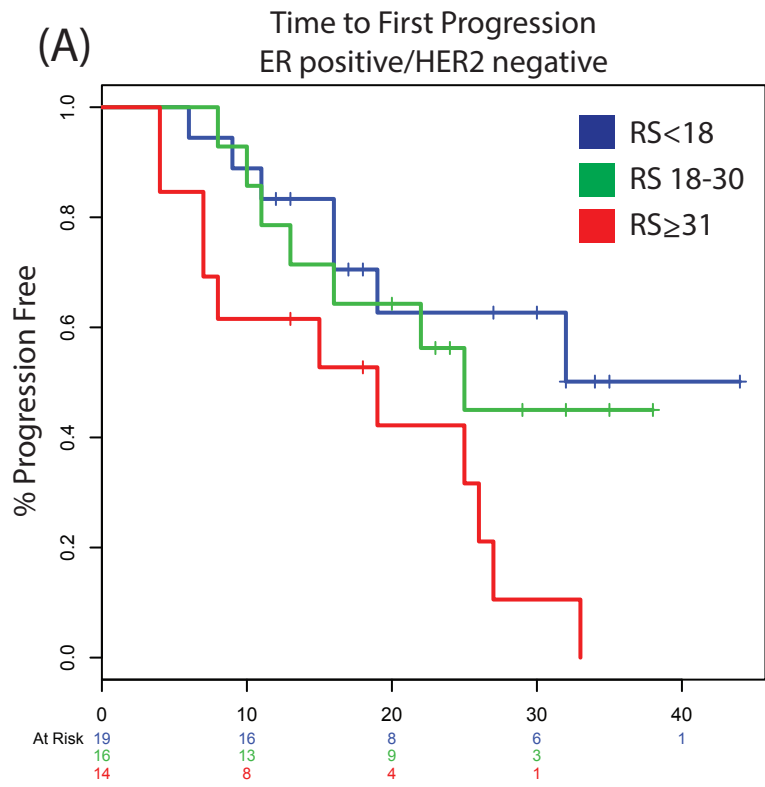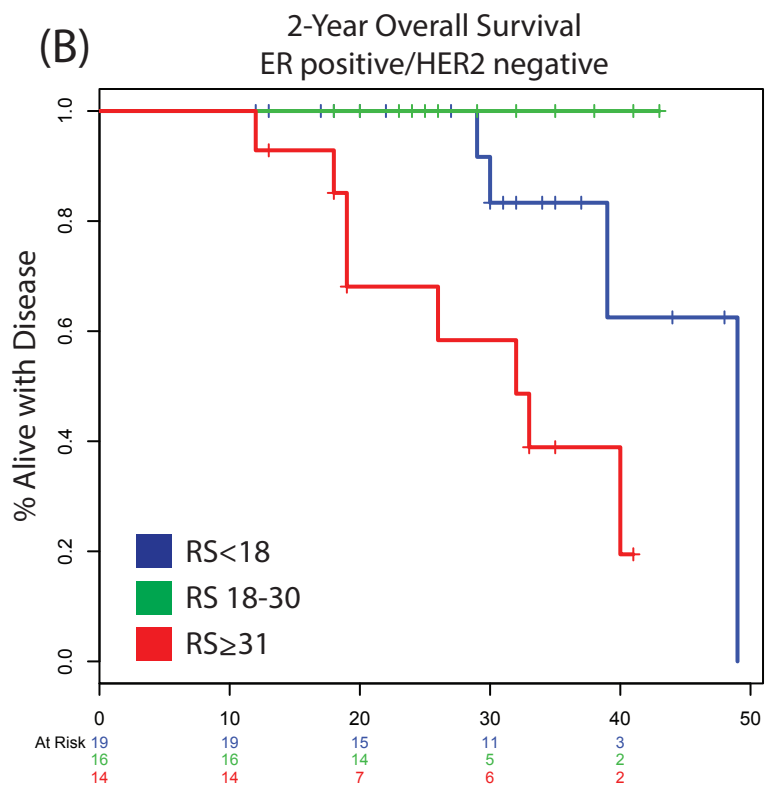

Supplement: NIHMS810757-supplement-Supplemental_Figure_3.pdf [file NIHMS810757-supplement-Supplemental_Figure_3.pdf]

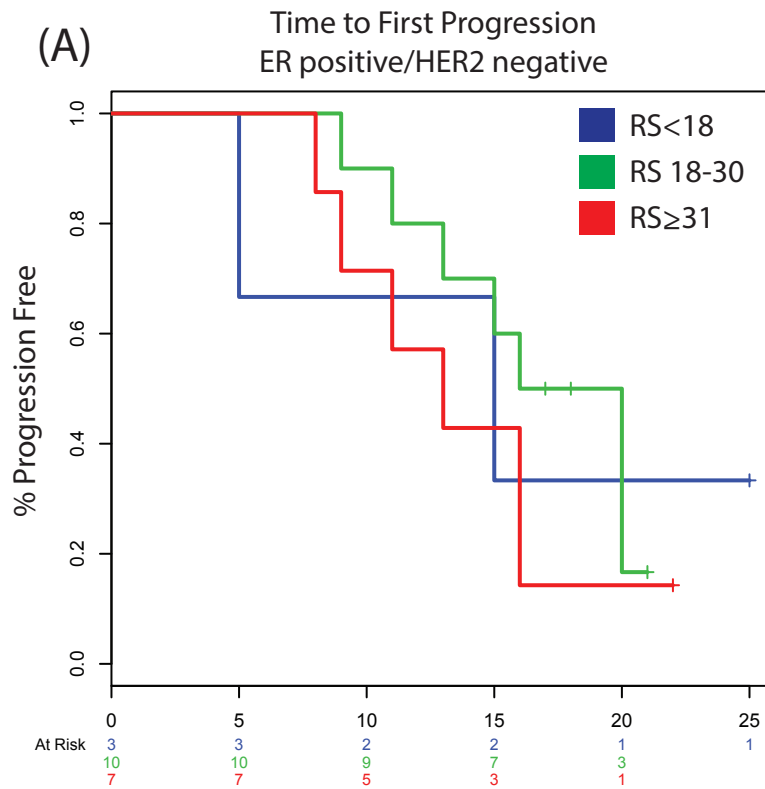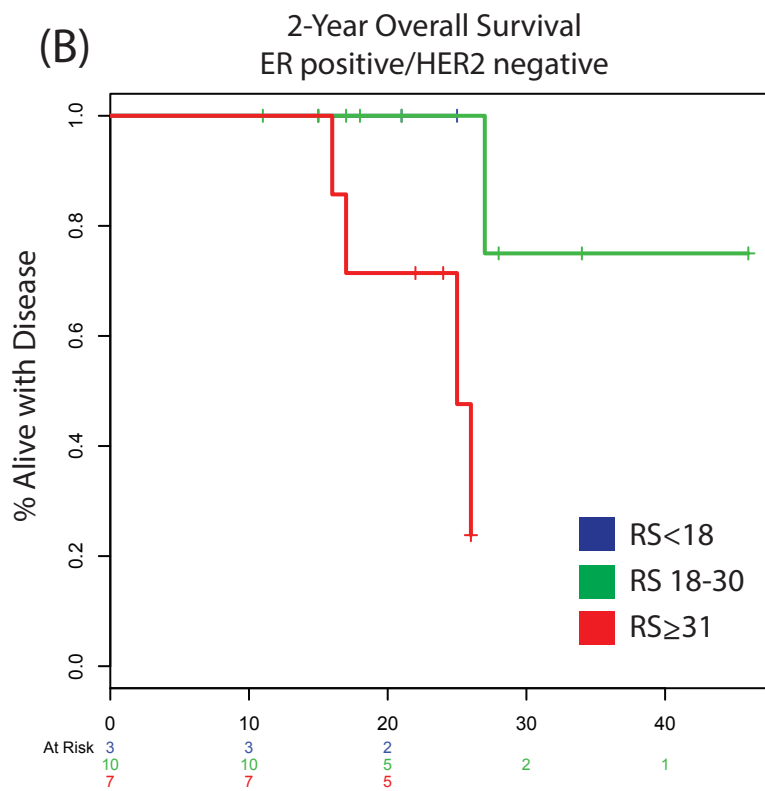

Supplement: NIHMS810757-supplement-Supplemental_Figure_4.pdf [file NIHMS810757-supplement-Supplemental_Figure_4.pdf]
